# Supplementary material for: α-Arrestin ARRDC3 tumor suppressor function is linked to GPCR-induced TAZ activation and breast cancer metastasis
Source: Oxford University Press journal article supplement (doi:10.1242/jcs.254888), 2021-03-15
Supplement: jcs254888supp.pdf [file jcs254888supp.pdf]

Supplementary Information

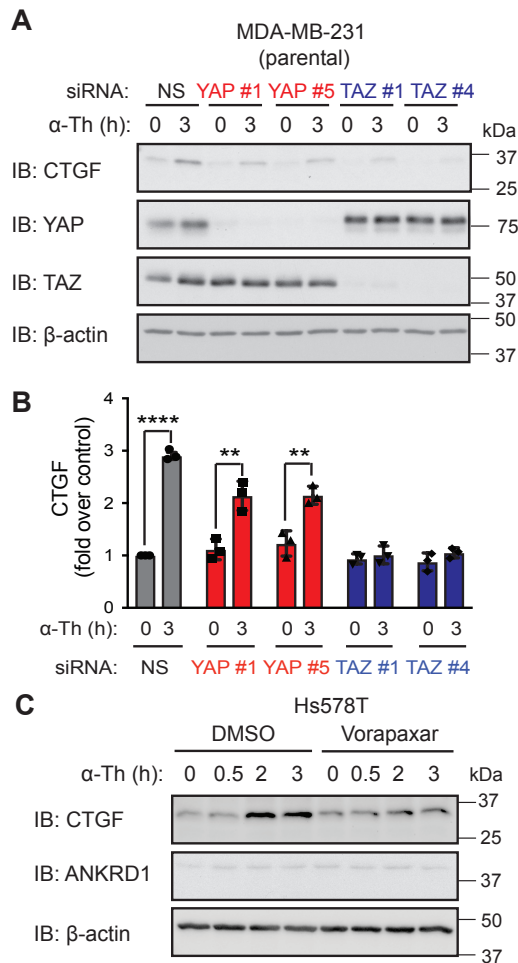

**Figure S1.** **A** and **B**, Parental MDA-MB-231 cells were transfected with respective siRNAs, serum-starved overnight then stimulated with 10 nM  $\alpha$ -thrombin for 3 h. The data shown (mean  $\pm$  S.D., n=3) is represented as the fold-increase in CTGF expression (**B**) relative to 0 min NS transfected control. Statistical significance was determined by one-way ANOVA. **C**, Hs578T cells were serum-starved overnight, pretreated with DMSO or the PAR1-specific antagonist Vorapaxar for 1 h then treated with 10 nM  $\alpha$ -thrombin for the indicated times. Cells were lysed and immunoblotted for CTGF, ANKRD1 and  $\beta$ -actin expression.

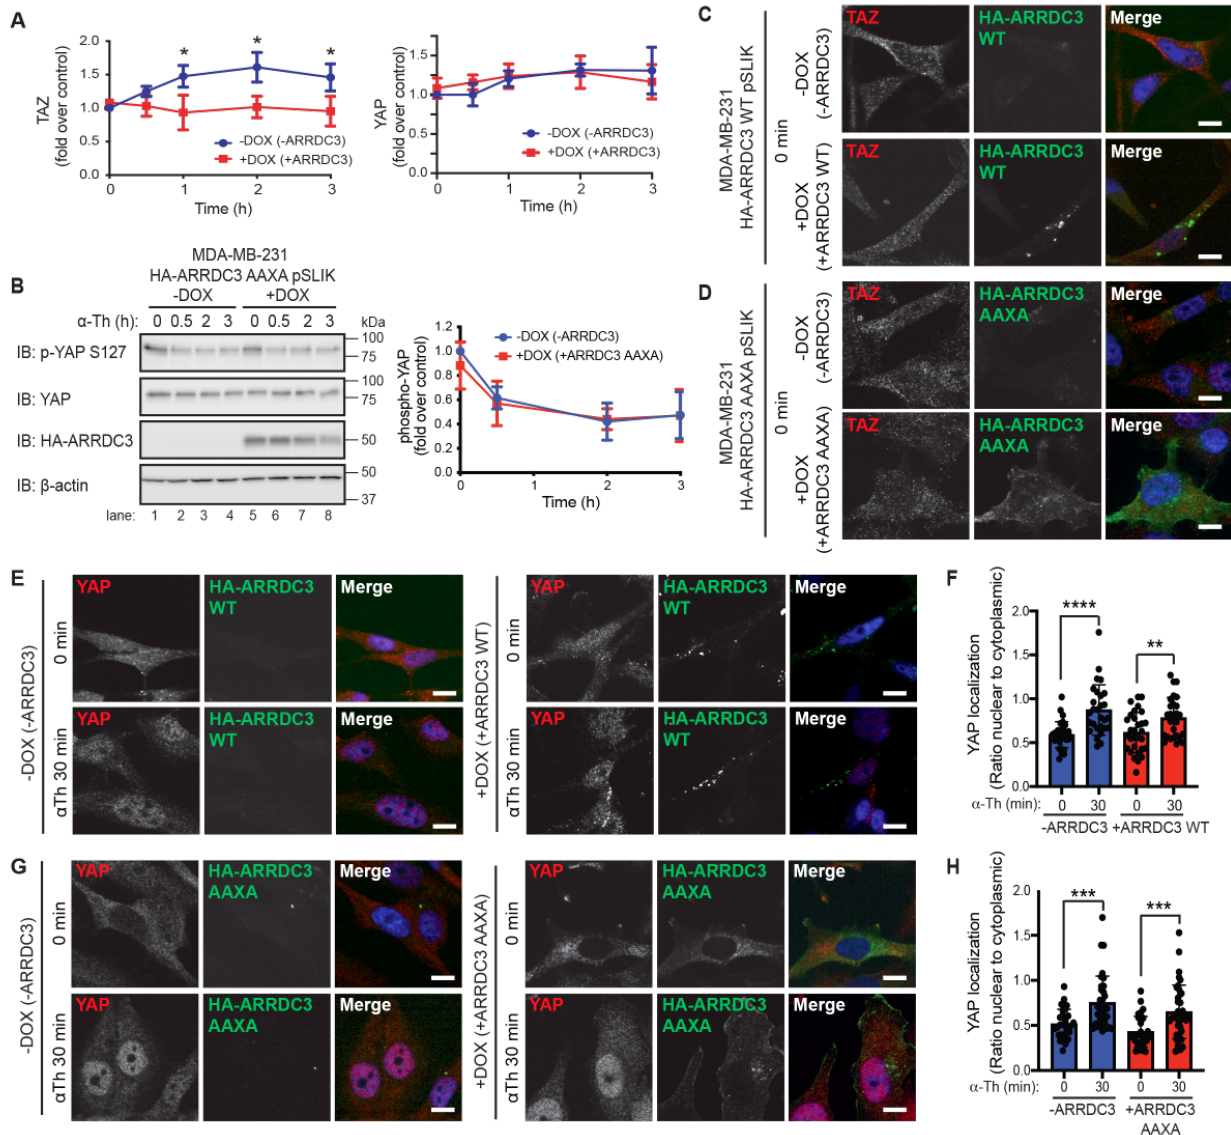

**Figure S2.** MDA-MB-231 WT (A) and AAXA mutant (B) HA-ARRDC3 pSLIK cells were treated with or without 10 µg/ml DOX for 48 h, serum-starved overnight, then stimulated with 10 nM  $\alpha$ -thrombin for various times. The data shown (mean  $\pm$  S.D.,  $n=3$ ) are represented as the fold-change in total TAZ (A), total YAP (A), and YAP phosphorylation (B) relative to 0 min -DOX control. Statistical significance was determined by unpaired  $t$ -test comparing -DOX and +DOX at each time point. C-H, TAZ and YAP subcellular localization was determined by immunofluorescence staining of endogenous TAZ (C and D) and YAP (E and G) in MDA-MB-231 WT HA-ARRDC3 pSLIK (C, E) and MDA-MB-231 AAXA mutant HA-ARRDC3 pSLIK (D, G) cells. After  $\alpha$ -thrombin treatment, cells were fixed, processed, stained for TAZ or YAP (red), HA-ARRDC3 (green) and DAPI for nuclei (blue) and imaged by confocal microscopy. C,D,E,G, Images are representative of many cells examined in three independent experiments. Scale bars, 10 µm. F,H, Quantification of the ratio nuclear to cytoplasmic YAP localization from at least 9 fields of view from each biological replicate. Statistical significance was determined by one-way ANOVA of each time point compared to 0 min.
